# Supplementary material for: Cobalt-ferrite functionalized graphitic carbon nitride (CoFe2O4@g-C3N4) nanoconfined catalytic membranes for efficient water purification: performance and mechanism
Source: Royal Society of Chemistry journal article supplement (doi:10.1039/d3ta03247g), 2023-01-01
Supplement: d3ta03247g1.pdf [file d3ta03247g1.pdf]

## Supplementary information

### **Cobalt-ferrite functionalized graphitic carbon nitride (CoFe<sub>2</sub>O<sub>4</sub>@g-C<sub>3</sub>N<sub>4</sub>) nanoconfined catalytic membrane for efficient water purification: Performance and mechanism**

Wei Zhang<sup>a,b,c</sup>, Shaoze Zhang<sup>d</sup>, Zhen Chen<sup>e</sup>, and Zhenghua Zhang<sup>a,b,c\*</sup>

<sup>a</sup>Membrane & Nanotechnology-Enabled Water Treatment Center, Institute of Environment and Ecology, Tsinghua Shenzhen International Graduate School, Tsinghua University, Shenzhen 518055, Guangdong, China

<sup>b</sup>Guangdong Provincial Engineering Research Center for Urban Water Recycling and Environmental Safety, Tsinghua-Shenzhen International Graduate School, Tsinghua University, Shenzhen 518055, Guangdong, China

<sup>c</sup>School of Environment, Tsinghua University, Beijing 100084, China

<sup>d</sup>National Engineering Research Center for Vacuum Metallurgy, Engineering Laboratory for Advanced Battery and Materials of Yunnan Province, Kunming University of Science and Technology, Kunming 650093, Yunnan province, China

<sup>e</sup>Institute of Material, Tsinghua Shenzhen International Graduate School, Tsinghua University, Shenzhen 518055, Guangdong, China.

**Journal of Materials Chemistry A**

Submitted June 2023

\*Corresponding author: [zhenghua.zhang@sz.tsinghua.edu.cn](mailto:zhenghua.zhang@sz.tsinghua.edu.cn) (Z. Zhang)

## **Text S1. Chemicals**

Ranitidine hydrochloride (> 98%) was received from Tokyo Chemical Industry Co. Ltd. Urea, tetracycline (TC), carbamazepine (CBZ), sulfamethoxazole (SMZ) were purchased from Shanghai Yuanye Bio-Technology Co., Ltd. Iron(II) sulfate heptahydrate ( $\text{FeSO}_4 \cdot 7\text{H}_2\text{O}$ ) was supplied by Sinopharm Chemical Reagent Co., Ltd. Cobalt nitrate hexahydrate ( $\text{Co}(\text{NO}_3)_2 \cdot 6\text{H}_2\text{O}$ ) was purchased from Meryer Co., Ltd. L-Histidine base (L-HIS) was purchased from Biofroxx GmbH. 2,2,6,6-Tetramethyl-4-piperidone hydrochloride (TEMP,  $\geq 99.0\%$ ) was obtained from Dojindo Co., Ltd. Phenol was supplied by ANPEL Laboratory Technologies (Shanghai) Inc. PMS ( $\text{KHSO}_5$ ,  $\geq 99.0\%$ ), oxalic acid dihydrate ( $\text{H}_2\text{C}_2\text{O}_4 \cdot 2\text{H}_2\text{O}$ ), methyl orange (MO, IND), Tert-butyl alcohol (TBA,  $\geq 99.5\%$ ), 5,5-dimethyl-1-pyrroline (DMPO,  $\geq 99.0\%$ ) and methanol ( $\geq 99.5\%$ ) were purchased from Aladdin Industrial Corporation. All solutions were prepared with ultrapure water produced by a Milli-Q system.

## **Text S2. Characterizations of $\text{CoFe}_2\text{O}_4@ \text{g-C}_3\text{N}_4$ membranes**

Scanning electron microscopy (SEM, TESCAN MIRA LMS, TESCAN, Czech) was used to observe the morphology of  $\text{CoFe}_2\text{O}_4@ \text{g-C}_3\text{N}_4$  NS, membrane surface, and membrane cross-section. Transmission electron microscopy (TEM; FEI Tecnai F20, FEI, Netherlands) was used to examine the microstructure of the  $\text{CoFe}_2\text{O}_4@ \text{g-C}_3\text{N}_4$  NS. X-ray diffraction (XRD; SmartLab SE, Rigaku, Japan) was adopted to determine the crystal structure of the  $\text{CoFe}_2\text{O}_4@ \text{g-C}_3\text{N}_4$  NS and the  $\text{CoFe}_2\text{O}_4@ \text{g-C}_3\text{N}_4$  membrane. Fourier transform infrared (FTIR) spectroscopy (Nicolet iS20, Thermo Fisher Scientific, America) was used to detect the chemical bonds in  $\text{g-C}_3\text{N}_4$  NS and  $\text{CoFe}_2\text{O}_4@ \text{g-C}_3\text{N}_4$  NS. The chemical states of the elements in the fresh  $\text{CoFe}_2\text{O}_4@ \text{g-C}_3\text{N}_4$  membrane and the used  $\text{CoFe}_2\text{O}_4@ \text{g-C}_3\text{N}_4$  membrane were determined by X-ray photoelectron spectroscopy (XPS; Thermo Scientific K-Alpha, Thermo Fisher Scientific, America). The thickness of the  $\text{CoFe}_2\text{O}_4@ \text{g-C}_3\text{N}_4$  NS was measured by atomic force microscopy (AFM, Bruker Dimension Icon, Bruker, Germany). The pore size and specific surface area of the  $\text{CoFe}_2\text{O}_4@ \text{g-C}_3\text{N}_4$

membrane were measured by nitrogen adsorption-desorption isotherms using the Brunauer-Emmett-Teller (BET) theory (ASAP 2460, Micromeritics, USA). Total organic carbon (TOC) analyzer (TOC-V<sub>CPH</sub>, Shimadzu, Japan) was used to measure the mineralization efficiency of pollutants. The ROS generated during the catalytic process were identified using electron paramagnetic resonance (EPR) spectroscopy (MS-5000, Bruker, Germany). Inductively coupled plasma-mass spectrometry (ICP-MS, Agilent 720ES, Agilent, USA) was used to quantify cobalt and iron dissolved. The instrument parameters are listed in Table S1. Liquid chromatography-mass spectrometry (LC-MS, 1290UPLC-6550QTOF, Agilent, USA) was used to detect degradation intermediates, and the operating conditions were listed in Table S2.

### Text S3. DFT calculations

All the periodical calculations were carried out by the Vienna Ab initio Simulation Package (VASP) software [1-4]. The Perdew-Burke-Ernzerhof (PBE) exchange-correlation functions [5] with a projector-augmented wave (PAW) scheme [6] was implied to describe the ion-electron exchange-correlation. The DFT-D3 [7], including Becke-Johnson damping [8] was used to correct the dispersion. The energy cutoff for the plane-wave expansion was setup to the value of 450 eV. The Brillouin zone integration was generated according to the Monkhorst-Pack method [9] using a Gamma centered  $2 \times 2 \times 1$   $k$ -point mesh. All structures were relaxed until the energy changed below  $1 \times 10^{-5}$  eV, and the forces on each atom less than 0.01 eV/Å.

To model the CoFe<sub>2</sub>O<sub>4</sub>@g-C<sub>3</sub>N<sub>4</sub> substrate, a heterojunction contains the plane of CoFe<sub>2</sub>O<sub>4</sub> (111) and g-C<sub>3</sub>N<sub>4</sub> (001) was constructed. The adsorption energy ( $E_{ads}$ ) was calculated as:

$$E_{ads} = E_{system} - E_{surface} - E_{PMS} \quad (1)$$

where the  $E_{system}$  is the energy of the optimized PMS/CoFe<sub>2</sub>O<sub>4</sub>@g-C<sub>3</sub>N<sub>4</sub> system;  $E_{surface}$  is the energy of the bare CoFe<sub>2</sub>O<sub>4</sub>@g-C<sub>3</sub>N<sub>4</sub> heterojunction;  $E_{PMS}$  is the energy of an optimized PMS molecule within a  $30 \times 30 \times 30$  box.

To illustrate the PMS dissociation process, the transition states were located utilizing the climbing Nudged Elastic Band (CINEB) method implemented in VASP-

VTST code [10]. After the CINEB calculations, the frequency calculations were performed with a numerical algorithm and atomic displacement of 0.015Å. A true transition state from CINEB calculations was confirmed by a single negative frequency. The free energy corrections were accomplished with the VASPKIT program [11] at the temperature of 298.15K.

The electron density difference (EDD) was defined as:

$$\Delta\rho(r) = \rho_{system}(r) - \rho_{g-C_3N_4}(r) - \rho_{CoFe_2O_4}(r) - \rho_{SO_4}(r) - \rho_{OH}(r) \quad (2)$$

where  $\rho_{system}$ ,  $\rho_{g-C_3N_4}$ ,  $\rho_{CoFe_2O_4}$ ,  $\rho_{SO_4}$ , and  $\rho_{OH}$  are the electronic densities of the PMS/CoFe<sub>2</sub>O<sub>4</sub>@g-C<sub>3</sub>N<sub>4</sub> system, CoFe<sub>2</sub>O<sub>4</sub>, g-C<sub>3</sub>N<sub>4</sub>, SO<sub>4</sub> and OH species, respectively.

#### **Text S4. Crystal plane spacing calculation**

The crystal plane spacing was calculated using the Bragg equation:

$$d = \frac{n\lambda}{2\sin\theta} \quad (3)$$

where  $d$  (nm) represents the crystal plane spacing;  $n$  is the diffraction order (value is 1);  $\lambda$  (nm) is the wavelength (0.1542 nm);  $\theta$  (°) is the diffraction half-angle.

#### **Text S5. Membrane flux calculation**

The membrane water flux  $J$  (L·m<sup>-2</sup>·h<sup>-1</sup>) through the CoFe<sub>2</sub>O<sub>4</sub>@g-C<sub>3</sub>N<sub>4</sub> membrane was calculated using Equation (4):

$$J = \frac{V}{A \times T} \quad (4)$$

where  $J$  is the water flux at 1 bar;  $V$  (L) represents the membrane-permeated solution volume;  $A$  (m<sup>2</sup>) represents the effective membrane filtration surface area (1.766 cm<sup>2</sup>);  $T$  (h) is the filtration time.

#### **Text S6. Determination of PMS decomposition efficiency**

Firstly, a test solution containing 100 g/L KI and 5 g/L NaHCO<sub>3</sub> was prepared. Then, 0.2 mL sample and 20 mL test solution were fully mixed and placed for more than 30 min followed by the UV absorbance measurement at 352 nm. The PMS decomposition efficiency,  $D$  (%), was calculated using Equation (5):

$$D = \frac{A_0 - A_t}{A_0} \times 100\% \quad (5)$$

where  $A_0$  is the absorbance of the original PMS test solution, and  $A_t$  is the absorbance of the sample solution at the specified time point.

### **Text S7. Membrane retention time calculation**

The retention time ( $r_m$ , ms) in the  $\text{CoFe}_2\text{O}_4@\text{g-C}_3\text{N}_4$  membrane was calculated as follows:

$$r_m = \frac{V \times M}{J \times A} \quad (6)$$

where  $V$  ( $\text{cm}^3 \cdot \text{g}^{-1}$ ) represents the specific pore volume of the  $\text{CoFe}_2\text{O}_4@\text{g-C}_3\text{N}_4$  membrane,  $M$  (g) is the total mass of the  $\text{CoFe}_2\text{O}_4@\text{g-C}_3\text{N}_4$  membrane,  $J$  ( $\text{L} \cdot \text{m}^{-2} \cdot \text{h}^{-1}$ ) represents the membrane water flux,  $A$  ( $\text{m}^2$ ) is the effective membrane filtration surface area.

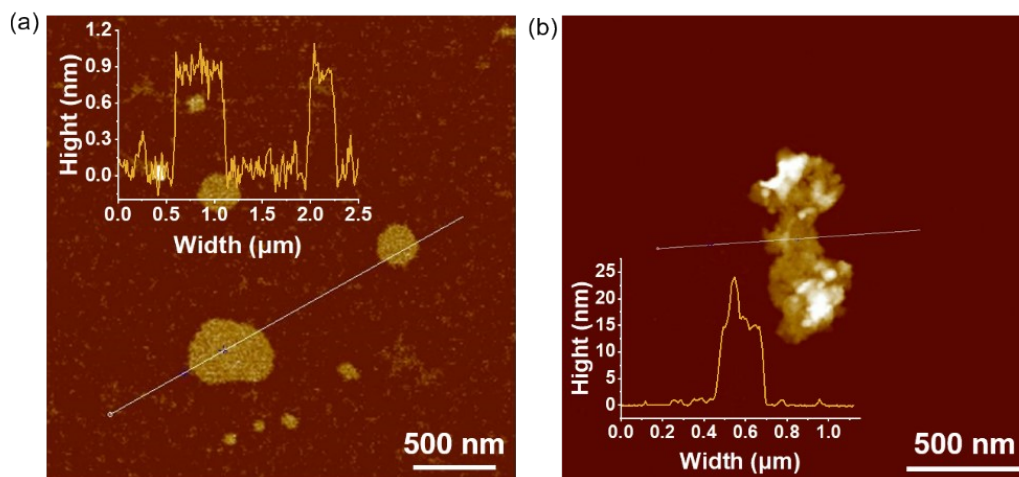

**Figure S1.** The thickness of g-C<sub>3</sub>N<sub>4</sub> NS (a) and CoFe<sub>2</sub>O<sub>4</sub>@g-C<sub>3</sub>N<sub>4</sub> NS (b) measured by AFM.

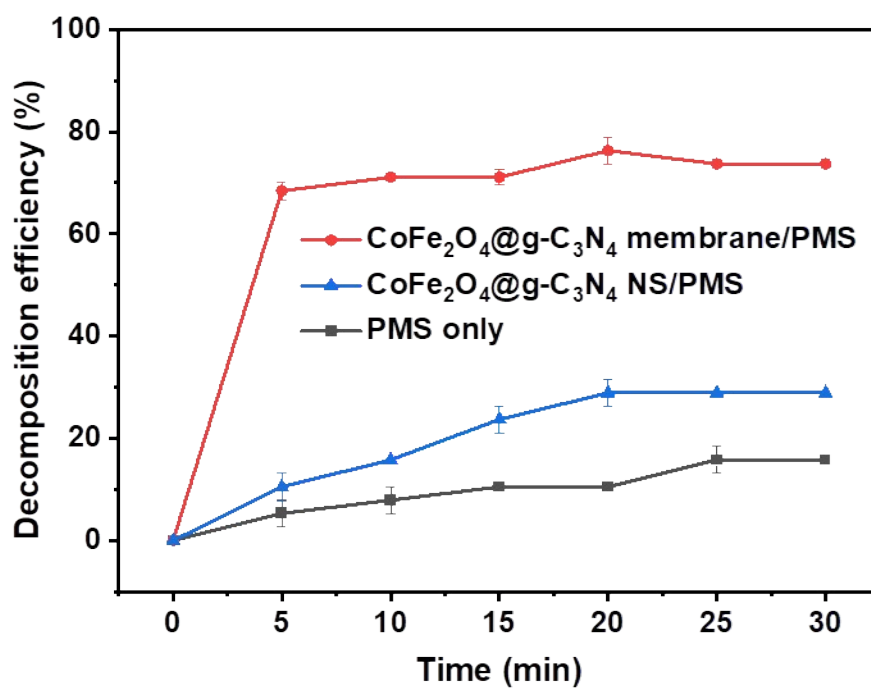

**Figure S2.** Decomposition efficiency of PMS in different systems.

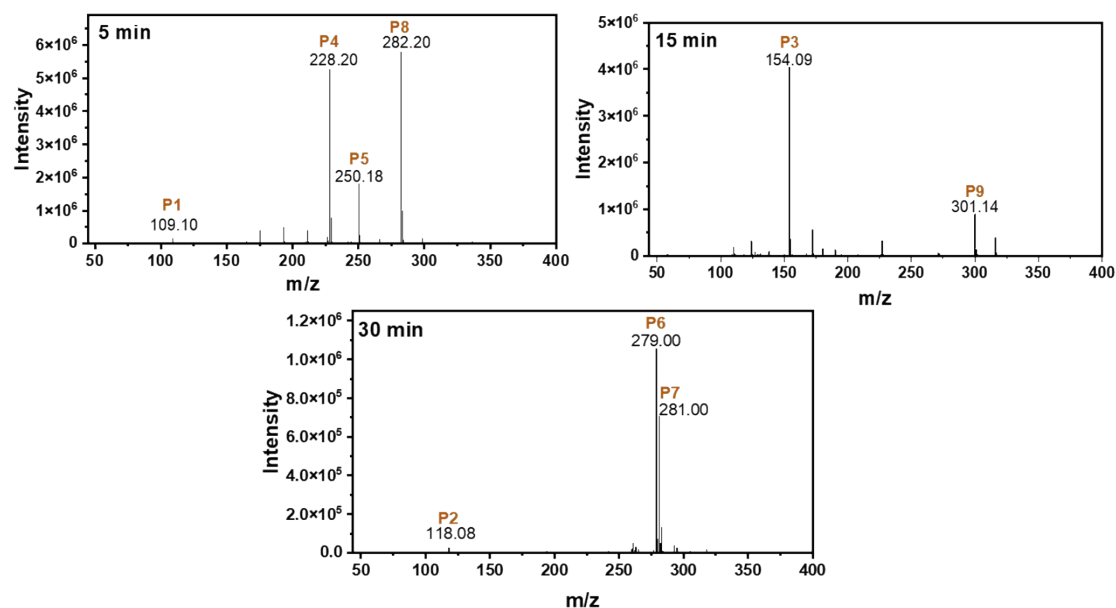

**Figure S3.** Spectra of ranitidine degradation intermediates by the  $\text{CoFe}_2\text{O}_4@\text{g-C}_3\text{N}_4$  membrane/PMS system at different reaction times: 5 min, 15 min and 30min.

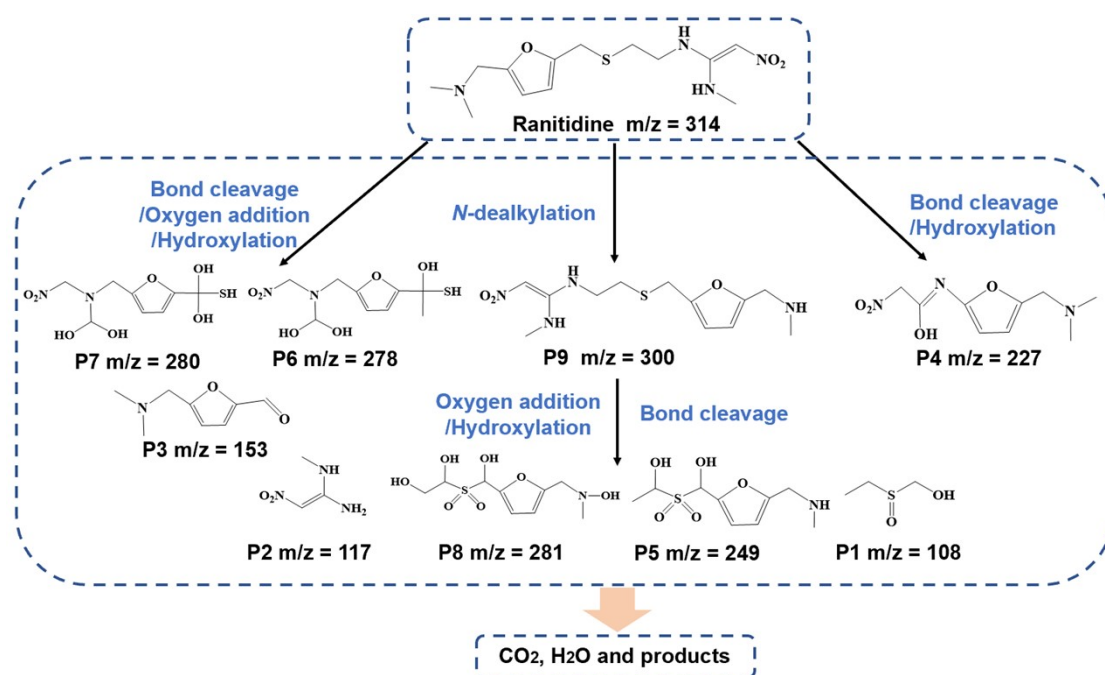

**Figure S4.** Possible degradation pathways of ranitidine in the  $\text{CoFe}_2\text{O}_4@\text{g-C}_3\text{N}_4$  membrane/PMS system.

**Table S1.** Test results and instrument parameters of ICP-MS.

|                              |                |            |               |                       |
|------------------------------|----------------|------------|---------------|-----------------------|
| <b>Instrument parameters</b> | RF Power       | 1.50 KW    | Omega Lens    | 10.1 V                |
|                              | RF Matching    | 1.80 V     | Cell Entrance | -45 V                 |
|                              | Auxiliary flow | 1.50 L/min | Deflect       | 3.8 V                 |
|                              | Carrier Gas    | 1.10 L/min | Cell Exit     | -62 V                 |
|                              | Omega Bias     | -105 V     | Plate Bias    | -60 V                 |
| <b>Test results</b>          | Element        | Co         | Concentration | 24.79 $\mu\text{g/L}$ |
|                              |                | Fe         | Concentration | 10.24 $\mu\text{g/L}$ |

**Table S2.** Operating conditions of LC-MS.

| LC operating conditions |                                                | MS operating conditions      |             |
|-------------------------|------------------------------------------------|------------------------------|-------------|
| Eluent A                | 0.1% Formic acid                               | Detection mode               | ESI+        |
| Eluent B                | Methanol                                       | Gas temperature              | 350°C       |
| Chromatographic column  | Waters BEH C18<br>2.1×100 mm 1.7 $\mu\text{m}$ | Mass spectrum scanning range | 30-1000 m/z |
| Sample injection        | 5 $\mu\text{L}$                                | Gas flow rate                | 12 L/min    |
| Liquid flow rate        | 0.3 mL/min                                     | Voltage                      | 4000 V      |

**Table S3.** Comparison of first-order rate constants of ranitidine removal in different systems.

| Methods                 | Materials                                   | Ranitidine concentration (mg/L) | Removal efficiency | Reaction time | Catalyst dosage | $k$ ( $\text{min}^{-1}$ ) | Ref |
|-------------------------|---------------------------------------------|---------------------------------|--------------------|---------------|-----------------|---------------------------|-----|
| Photocatalysis          | PMOFs                                       | 38                              | 93.1%              | 120 min       | 100 mg/L        | 0.01833                   | 12  |
| Photocatalysis          | $\text{Fe}^{2+}$ /PS                        | 9                               | 95%                | 60 min        | 50 mg/L         | 0.05                      | 13  |
| Photocatalysis          | $\text{Fe}_3\text{O}_4$ /GE/SCN             | 1                               | 100%               | 40 min        | 1 g/L           | 0.077                     | 14  |
| Photocatalysis          | MXene- $\text{Ti}_3\text{C}_2/\text{MoS}_2$ | 10                              | 88.4%              | 60 min        | 1 g/L           | 0.0315                    | 15  |
| Photocatalysis          | MXene- $\text{Ti}_3\text{C}_2$              | 10                              | 18.4%              | 60 min        | 1 g/L           | 0.0032                    | 15  |
| Photocatalysis          | Degussa P25 nanoparticles                   | 3                               | --                 | 120 min       | --              | 0.011                     | 16  |
| Photocatalysis          | $\text{TiO}_2$ -nanofiber film              | 3                               | --                 | 129 min       | --              | 0.0080                    | 16  |
| Heterogeneous catalysis | OM- $\text{Co}_3\text{O}_4$                 | 10                              | 99.2%              | 7 min         | 0.025 g/L       | 0.719                     | 17  |



|                                          |                                                                            |    |       |         |                         |        |           |
|------------------------------------------|----------------------------------------------------------------------------|----|-------|---------|-------------------------|--------|-----------|
| Heterogeneous catalysis                  | BN- Co <sub>3</sub> O <sub>4</sub> NC                                      | 10 | 99.6% | 10 min  | 0.03 g/L                | 0.682  | 18        |
| Heterogeneous catalysis                  | Co <sub>3</sub> O <sub>4</sub> NS                                          | 5  | 47.2% | 30 min  | 0.02 g/L                | 0.021  | 19        |
| Heterogeneous catalysis                  | Co-Cu ONS                                                                  | 5  | 100%  | 60 s    | 0.017 g/L               | 4.2    | 20        |
| Membrane-based nanoconfinement catalysis | Co <sub>3</sub> O <sub>4</sub> membrane                                    | 5  | 100%  | 385 ms  | 0.7 mg/cm <sup>2</sup>  | 600    | 19        |
| Membrane-based nanoconfinement catalysis | Co-Cu ONS membrane                                                         | 5  | 100%  | 85.7 ms | 0.4 mg/cm <sup>2</sup>  | 3180   | 20        |
| Membrane-based nanoconfinement catalysis | Co@g-C <sub>3</sub> N <sub>4</sub> membrane                                | 5  | 100%  | 33 ms   | 0.75 mg/cm <sup>2</sup> | 4800   | 21        |
| Heterogeneous catalysis                  | CoFe <sub>2</sub> O <sub>4</sub> @g-C <sub>3</sub> N <sub>4</sub> NS       | 5  | 49.4% | 30 min  | 0.02 g/L                | 0.0229 | This work |
| Membrane-based nanoconfinement catalysis | CoFe <sub>2</sub> O <sub>4</sub> @g-C <sub>3</sub> N <sub>4</sub> membrane | 5  | 100%  | 54.6 ms | 0.5 mg/cm <sup>2</sup>  | 5280   | This work |

**Table S4.** XPS of the fresh and the used membranes.

| Element      | Bond type | Fresh membrane |          |       | Used membrane |           |       |
|--------------|-----------|----------------|----------|-------|---------------|-----------|-------|
|              |           | E/ev           | A        | at/%  | E/ev          | A         | at/%  |
| <b>Co 2p</b> | ≡Co(II)   | 781.1          | 9419.98  | 24.05 | 781.4         | 33199.42  | 15.28 |
|              |           | 785.5          | 7461.12  | 19.06 | 785.5         | 65204.36  | 29.90 |
|              |           | 794.9          | 2835.08  | 7.33  | 795.5         | 11318.49  | 5.32  |
|              | ≡Co(III)  | 801.8          | 5222.52  | 13.49 | 802.0         | 20009.56  | 8.97  |
|              |           | 778.6          | 11458.29 | 29.33 | 779.0         | 72852.86  | 33.22 |
|              |           | 793.6          | 2670.55  | 6.74  | 794.0         | 16303.79  | 7.31  |
| <b>Fe 2p</b> | ≡Fe(II)   | 709.2          | 20222.68 | 32.26 | 709.1         | 95364.95  | 22.03 |
|              |           | 715.0          | 7287.71  | 11.61 | 714.9         | 43233.69  | 10.04 |
|              |           | 722.4          | 6443.34  | 10.32 | 722.6         | 72451.52  | 16.96 |
|              | ≡Fe(III)  | 729.4          | 2304.92  | 3.55  | 729.1         | 16659.34  | 3.92  |
|              |           | 711.5          | 10483.17 | 16.77 | 711.36        | 100769.19 | 23.33 |
|              |           | 718.9          | 6082.94  | 9.68  | 718.2         | 46835.25  | 10.92 |
|              |           | 724.8          | 7411.74  | 11.94 | 725.4         | 38183.34  | 8.96  |
|              |           | 732.9          | 2423.57  | 3.87  | 732.5         | 16193.19  | 3.83  |

**Table S5.** Intermediate products of ranitidine degradation.

| Compounds  | Molecular mass | Experimental mass | Structure                                                                            |
|------------|----------------|-------------------|--------------------------------------------------------------------------------------|
| Ranitidine | 314            | 315.0             | 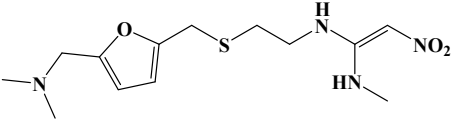   |
| P1         | 108            | 109.10            |   |
| P2         | 117            | 118.08            |    |
| P3         | 153            | 154.09            |    |
| P4         | 227            | 228.20            |   |
| P5         | 249            | 250.18            |  |
| P6         | 278            | 279.00            |  |
| P7         | 280            | 281.00            |  |
| P8         | 281            | 282.21            |  |
| P9         | 300            | 301.14            |  |

## References

- [1] G. Kresse, J. Hafner, Ab initio molecular dynamics for liquid metals, *Phys. Rev. B.* 47 (1993) 558–561. DOI:10.1103/PhysRevB.47.558.
- [2] G. Kresse, J. Hafner, Ab initio molecular-dynamics simulation of the liquid-metal-

- amorphous-semiconductor transition in germanium, *Phys. Rev. B.* 49 (1994) 14251–14269. DOI:10.1103/PhysRevB.49.14251.
- [3] G. Kresse, J. Furthmüller, Efficiency of ab-initio total energy calculations for metals and semiconductors using a plane-wave basis set, *Comput. Mater. Sci.* 6 (1996) 15–50. DOI:10.1016/0927-0256(96)00008-0.
- [4] G. Kresse, J. Furthmüller, Efficient iterative schemes for ab initio total-energy calculations using a plane-wave basis set, *Phys. Rev. B.* 54 (1996) 11169–11186. DOI:10.1103/PhysRevB.54.11169.
- [5] J.P. Perdew, K. Burke, M. Ernzerhof, Generalized Gradient Approximation Made Simple, *Phys. Rev. Lett.* 77 (1996) 3865–3868. DOI:10.1103/PhysRevLett.77.3865.
- [6] G. Kresse, D. Joubert, From ultrasoft pseudopotentials to the projector augmented-wave method, *Phys. Rev. B.* 59 (1999) 1758–1775. DOI:10.1103/PhysRevB.59.1758.
- [7] S. Grimme, J. Antony, S. Ehrlich, H. Krieg, A consistent and accurate ab initio parametrization of density functional dispersion correction (DFT-D) for the 94 elements H-Pu, *J. Chem. Phys.* 132 (2010) 154104. DOI:10.1063/1.3382344.
- [8] A.D. Becke, E.R. Johnson, Exchange-hole dipole moment and the dispersion interaction, *J. Chem. Phys.* 122 (2005) 154104. DOI:10.1063/1.1884601.
- [9] H.J. Monkhorst, J.D. Pack, Special points for Brillouin-zone integrations, *Phys. Rev. B Condens. Matter.* 13 (1976) 5188–5192. DOI:10.1103/PhysRevB.13.5188.
- [10] G. Henkelman, B. Uberuaga, H. Jónsson, A climbing image nudged elastic band method for finding saddle points and minimum energy paths, (2000). DOI:10.1063/1.1329672.
- [11] V. Wang, N. Xu, J.C. Liu, G. Tang, W. Geng, VASPKIT: A user-friendly interface facilitating high-throughput computing and analysis using VASP code, *Comput Phys Commun.* (2021). DOI:10.1016/j.cpc.2021.108033.
- [12] J. Li, Y. Zhao, X. Wang, T. Wang, X. Hou, Rapid microwave synthesis of PCN-134-2D for singlet oxygen based-oxidative degradation of ranitidine under visible light: Mechanism and toxicity assessment, *Chem. Eng. J.* 443 (2022) 136424. DOI:

10.1016/j.cej.2022.136424.

- [13] S. Naim, A. Ghauch, Ranitidine abatement in chemically activated persulfate systems: Assessment of industrial iron waste for sustainable applications, *Chem. Eng. J.* 288 (2016) 276–288. DOI: 10.1016/j.cej.2015.11.101.
- [14] L. Wang, Q. Sun, Y. Dou, Z. Zhang, T. Yan, Y. Li, Fabricating a novel ternary recyclable Fe<sub>3</sub>O<sub>4</sub>/graphene/sulfur-doped g-C<sub>3</sub>N<sub>4</sub> composite catalyst for enhanced removal of ranitidine under visible-light irradiation and reducing of its N-nitrosodimethylamine formation potential, *J. Hazard. Mater.* 413 (2021) 125288. DOI: 10.1016/j.jhazmat.2021.125288.
- [15] X. Zou, X. Zhao, J. Zhang, W. Lv, L. Qiu, Z. Zhang, Photocatalytic degradation of ranitidine and reduction of nitrosamine dimethylamine formation potential over MXene–Ti<sub>3</sub>C<sub>2</sub>/MoS<sub>2</sub> under visible light irradiation, *J. Hazard. Mater.* 413 (2021) 125424. DOI: 10.1016/j.jhazmat.2021.125424.
- [16] K.J. Choi, S.W. Hong, Preparation of TiO<sub>2</sub> nanofibers immobilized on quartz substrate by electrospinning for photocatalytic degradation of ranitidine, *Res Chem Intermed.* 38 (2012) 1161–1169. DOI: 10.1007/s11164-011-0455-z.
- [17] Y. Ma, H. Wang, X. Lv, D. Xiong, H. Xie, Z. Zhang, Three-dimensional ordered mesoporous Co<sub>3</sub>O<sub>4</sub>/peroxymonosulfate triggered nanoconfined heterogeneous catalysis for rapid removal of ranitidine in aqueous solution, *Chemical Engineering Journal.* 443 (2022) 136495. DOI:10.1016/j.cej.2022.136495.
- [18] Y. Ma, B. Ji, X. Lv, D. Xiong, X. Zhao, H. Xie, Z. Zhang, Confined heterogeneous catalysis by boron nitride-Co<sub>3</sub>O<sub>4</sub> nanosheet cluster for peroxymonosulfate oxidation toward ranitidine removal, *Chemical Engineering Journal.* 435 (2022) 135126. DOI:10.1016/j.cej.2022.135126.
- [19] Z. Wang, C. Meng, W. Zhang, S. Zhang, B. Yang, Z. Zhang, Honeycomb-like holey Co<sub>3</sub>O<sub>4</sub> membrane triggered peroxymonosulfate activation for rapid degradation of organic contaminants, *Science of The Total Environment.* 814 (2022) 152698. DOI:10.1016/j.scitotenv.2021.152698.
- [20] C. Meng, Z. Wang, W. Zhang, L. Cui, B. Yang, H. Xie, Z. Zhang, Laminar membranes assembled by ultrathin cobalt-copper oxide nanosheets for

nanoconfined catalytic degradation of contaminants, *Chemical Engineering Journal*. 449 (2022) 137811. DOI:10.1016/j.cej.2022.137811.

- [21] W. Zhang, S. Zhang, C. Meng, Z. Zhang, Nanoconfined catalytic membranes assembled by cobalt-functionalized graphitic carbon nitride nanosheets for rapid degradation of pollutants, *Applied Catalysis B: Environmental*. 322 (2023) 122098. DOI:10.1016/j.apcatb.2022.122098.
